# Supplementary material for: Murine alveolar macrophages rapidly accumulate intranasally administered SARS-CoV-2 Spike protein leading to neutrophil recruitment and damage
Source: eLife. 2024 Mar 20;12:RP86764. doi: 10.7554/eLife.86764 (PMC10954308; doi:10.7554/eLife.86764)
Supplement: Figure 1—figure supplement 2—source data 1. [file elife-86764-fig1-figsupp2-data1.xlsx]

## Sheet: Sheet1
Neutrophil fragmentation was measured by counting the Ly6G+ granules in five different areas of 100 × 100 μm² each.
Number of Ly6G+ granules
ROI	1	2	3	4	5
Delta Env VLP	7	6	5	7	4
Spike VLP	18	29	21	25	30
