# Supplementary material for: Murine alveolar macrophages rapidly accumulate intranasally administered SARS-CoV-2 Spike protein leading to neutrophil recruitment and damage
Source: eLife. 2024 Mar 20;12:RP86764. doi: 10.7554/eLife.86764 (PMC10954308; doi:10.7554/eLife.86764)
Supplement: Figure 2—figure supplement 1—source data 1. [file elife-86764-fig2-figsupp1-data1.xlsx]

## Sheet: Sheet1
SARS-CoV-2 Spike protein uptake by lung leukocytes 18 hr following intranasal administration. Flow cytometry results from analysis of leukocytes purified from the lungs of WT or K18-hACE2 mice.
	Jax stock 664						Jax 034860 K18-hACE2
	Spike Trimer (CHO) (n=6)						Spike Trimer (CHO) (n=3)
Neutrophils	1.27	0.96	2.54	6.78	4.91	3.91	2.83	4.06	3.63
rMono	1.91	1.43	3.52	5.87	3.75	0.85	4.31	7.91	8.27
iMono	2.11	1.49	3.62	6.65	5.07	2.45	3.77	5.37	6.63
AMac	74.5	50.5	79.6	91	88.3	80.9	83.6	87.4	92.6
iMac1	1.05	1.42	12	19.4	16.8	5.06	4.9	6.86	7.97
iMac2	9.63	7.01	11.8	24.7	22.7	5.66	9.24	9.83	11.4
iMac3	16.3	12.2	27.2	41.5	33.1	60.5	12	9.33	13.1
Eosinophils	1.31	1.7	0.77	2.47	4.45	1.35	3.1	4.08	4.23
CD11b+DC	4.97	6.31	3.83	10.2	7.88	2.58	9.12	9.47	12.9
CD11b-DC	5.76	4.97	2.15	4.45	2.51	2.37	7.34	7.49	5.17
NK&NKT	0.84	0.74	0.89	1.93	1.16	1.1	3	3.73	4.14
B	0.53	0.67	1.02	1.78	1.46	0.87	2.07	2.74	2.4
T	0.25	0.23	1.12	1.92	2.21	0.36	2.11	2.89	3.13
