# Supplementary material for: Murine alveolar macrophages rapidly accumulate intranasally administered SARS-CoV-2 Spike protein leading to neutrophil recruitment and damage
Source: eLife. 2024 Mar 20;12:RP86764. doi: 10.7554/eLife.86764 (PMC10954308; doi:10.7554/eLife.86764)
Supplement: Figure 2—source data 1. [file elife-86764-fig2-data1.xlsx]

## Sheet: Sheet1
Leukocyte numbers in isolated lung tissue. Eighteen hr post intranasal administration of indicated Spike proteins lung tissue collected, processed, and leukocyte cell numbers determined by flow cytometry. Numbers of mice analyzed are indicated.
Cell Type	Saline (n=4)						Trimer (n=6)						PNGase F Tx. (n=5)						Kifunensine Tx. (n=4)						D614G (n=4)
Neutrophils	24700	35644	60547.2	17919			59635	45520	62995	64905	65896	50104.9	77555	47290	44670	31760.4	78456.6		100128	76472.5	97050.4	48416.3			68538	67336	24478	70957
Monocytes	19665	18919	80274.1	35683			62270	57065	144702	178390	163178	57671.8	55190	72595	43795	40900.1	90938.3		42435.4	42665.5	71872.2	72074.2			57132	50693	45282	51162
iMonocytes	9400	8209	61230.4	16842			26020	23800	48308	46871	53935	40799.7	24980	30305	27278	25971.9	71769.9		28767.1	29739.3	43398	39943.4			31061	19633	20456	23754
rMonocytes	9958	10466	17848.2	18457			35375	32600	95499	130353	108785	15849.5	29645	41345	16141	13938	18053.9		12953.1	12203.1	26917.8	30370.2			25256	30523	24201	26799
NK & NK T	53958	68974	79590.9	97668			79810	63585	120771	205207	132553	87325.8	73940	92665	152655	64053.9	109772		75016.8	103952	79563	91990.9			134429	116572	68997	101207
Mac	112615	92464	163964	128430			95625	105530	122784	145511	153807	178946	99890	107740	150153	159183	219545		179595	240445	214243	247583			171091	139579	147009	170540
alveolar Mac	103358	76013	101624	93823			68690	82015	88342	89778	105814	122706	67245	84640	128881	118816	138191		129531	178978	154731	191464			118134	85895	111644	108618
interstitial Mac	9093	16144	61913.6	34607			26595	23205	33995	55033	47308	55626.7	31770	27555	20646	40443.1	80685.5		49428.5	61376.8	59145.8	55568.7			53059	53148	35157	61516
iMac1	1083	2048	11272.5	3768			3345	2110	6933	10260	9370	10225.5	4590	3400	4630	8301.88	13707.6		9138.7	8406.55	11078.4	13864.7			4379	2838	3467	4873
iMac2	1055	1421	25875.6	19841			10905	9990	17445	27516	22397	23416.4	12410	12470	7132	17289.2	34324.8		20423	24315.7	24995.1	20026.7			29432	35585	20873	39996
iMac3	4510	8693	12297.3	7537			7070	7040	8499	15857	14855	11657.1	10195	6875	6632	7692.56	18276.8		11840.6	19163.3	13275.8	12874.3			14359	8743	7767	10963
CD11b+DC	3650	4481	6404.85	5691			4730	5940	9841	13991	14169	11452.6	4800	4190	5506	5255.32	8135.41		5006.42	5785.15	6500.55	6602.22			6212	4448	3883	7106
CD11b-DC	10933	10500	4013.71	6614			18245	16395	25272	27516	31539	7975.89	24070	28305	30281	4189.02	7578.19		3099.21	4338.86	7416.12	7482.52			6518	6519	4369	7004
Eosinophils	11770	11194	11272.5	25071			14115	10635	31758	22153	19197	17587.9	19795	10875	18769	13176.4	16605.2		8820.84	10124	9705.04	18266.1			26784	6519	12621	10659
B cells	168368	179876	221181	211486			213930	154990	160823	180346	193514	318013	123845	163185	179237	239917	303128		165291	203384	202341	303702			250526	177159	182375	277128
T cells	105750	115151	163110	121508			165455	133650	155051	175608	140847	234164	137285	128910	145147	163753	224002		153371	158188	179452	242081			147668	97399	97775	169525
