# Supplementary material for: Murine alveolar macrophages rapidly accumulate intranasally administered SARS-CoV-2 Spike protein leading to neutrophil recruitment and damage
Source: eLife. 2024 Mar 20;12:RP86764. doi: 10.7554/eLife.86764 (PMC10954308; doi:10.7554/eLife.86764)
Supplement: Figure 2—source data 2. [file elife-86764-fig2-data2.xlsx]

## Sheet: Sheet1
SARS-CoV-2 Spike protein uptake by lung leukocytes 18 hr following intranasal administration. Flow cytometry results from indicated mice.
Cell Type	Saline (n=4)								Trimer (n=6)								PNGase F Tx. (n=5)								Kifunensine Tx. (n=8)								D614G (n=4)
Neutrophils	0.98	1.44	1	1.56					1.27	0.96	2.54	6.78	4.91	3.91			1.26	0.42	1.44	5.65	4.25				1.77	1.81	1.17	1.11	2.27	4.51	1	3.03	8.21	1.84	5.93	2.6
Kifunensin	1.61	0.62	0.16	2.13					1.91	1.43	3.52	5.87	3.75	0.85			2.02	0.59	0.38	2.41	0.62				1.13	0.45	0.39	0.88	0.68	0.69	0.38	0.87	8.6	5.54	9.31	4.48
iMono	1.17	1.31	1.07	0.58					2.11	1.49	3.62	6.65	5.07	2.45			1.78	1.04	0.45	4.54	1.79				1.01	0.56	0.28	0.2	1.01	1.04	1.02	1.73	6.2	3.22	5.37	4.01
AMac	1.32	1.95	0.36	0.47					74.5	50.5	79.6	91	88.3	80.9			75.6	7.23	42.8	96.2	92.7				30.1	33.9	25.6	24.8	67.3	33.7	39.8	57	87.1	80.2	83	87
iMac1	2.22	3.18	1.61	4.91					1.05	1.42	12	19.4	16.8	5.06			0.65	1.03	2.49	7.54	3.8				2.24	1.5	1.74	1.82	3.6	3.7	3.27	4.16	10.6	6.2	9.83	11.5
iMac2	1.65	1.4	1.17	1.41					9.63	7.01	11.8	24.7	22.7	5.66			5.68	1.44	4.23	8.95	6.63				1.93	2.4	2.69	1.36	2.25	1.84	1.48	2.79	12.2	4.11	11.1	8.07
iMac3	3.48	2.58	0.78	0.18					16.3	12.2	27.2	41.5	33.1	60.5			32.9	7.85	7.86	68.4	66.2				4.87	4.39	5.53	4.23	44.6	23.9	22.1	37.6	14.2	5.09	12.8	9.59
Eosinophils	1.39	1.2	1.62	1.54					1.31	1.7	0.77	2.47	4.45	1.35			1.29	2.07	0.72	2.72	1.99				2.66	0.99	0.79	0.95	2.73	2.02	2.1	1.65	4.02	5.58	4.92	5.98
CD11b+DC	3.9	1.81	1.09	2.1					4.97	6.31	3.83	10.2	7.88	2.58			5.31	2.27	8.29	4.98	3.64				16	14	10.7	10.7	2.4	0.85	1.57	2.84	12	7.09	10.2	7.81
CD11b-DC	2.99	2.05	1.92	2					5.76	4.97	2.15	4.45	2.51	2.37			7.31	2.1	4.3	7.95	5.2				4.45	5.2	3.89	4.03	4.98	3.14	1.49	1.97	10.3	4.51	8.78	4.98
NK&NKT	0.31	0.22	0.83	1.27					0.84	0.74	0.89	1.93	1.16	1.1			1.06	0.31	0.2	2.19	1.31				0.26	0.18	0.25	0.19	0.61	0.58	0.82	0.86	4.03	2.14	4.5	4.08
B	0.24	0.1	0.42	0.55					0.53	0.67	1.02	1.78	1.46	0.87			0.79	0.34	0.23	1.59	1.58				0.13	0.16	0.12	0.17	0.79	0.68	0.41	0.63	2.91	1.7	2.11	1.92
T	0.14	0.038	0.096	0.35					0.25	0.23	1.12	1.92	2.21	0.36			0.33	0.14	0.22	0.98	0.49				0.19	0.16	0.17	0.14	0.29	0.14	0.16	0.35	3.5	1.25	2.51	2.09
