# Supplementary material for: Murine alveolar macrophages rapidly accumulate intranasally administered SARS-CoV-2 Spike protein leading to neutrophil recruitment and damage
Source: eLife. 2024 Mar 20;12:RP86764. doi: 10.7554/eLife.86764 (PMC10954308; doi:10.7554/eLife.86764)
Supplement: Figure 3—figure supplement 1—source data 1. [file elife-86764-fig3-figsupp1-data1.xlsx]

## Sheet: Sheet1
Figure 3-figure supplement 1 A
Evans blue (200 µl of 5 mg/ml in PBS) was intravenously injected 1.5 hours after intranasal Spike administration.
The indicated recombinant proteins' S1 domains (3 μg per mouse) were administered.
Saline	1.10319	0.925872	0.896815
SARS-CoV-2	2.26752	2.14268	2.09595
HCoV-HKU1	1.34947	1.09045	1.19369
Figure 3-figure supplement 1 B
The permeability of lung vasculature was measured by comparing wild-type mice with K18-hACE2 transgenic mice.
The SARS-CoV-2 Spike protein was administered at two different concentrations: 0.5 μg or 5 μg per mouse.
C57BL6 mice
SARS-CoV-2 Spike protein (μg per mouse)
0	0.83	1.171			1.355	0.849	0.795
0.5	0.872	0.98	0.957	1.445	1.168	1.057	0.812
5	1.481	2.046	2.276	1.827	1.619	2.183	2.181
K18-hACE2 transgenic mice
SARS-CoV-2 Spike protein (μg per mouse)
0	0.601	1.401	0.875	1.052	0.752
0.5	1.304	0.892	1.6	2.083	1.537
5	2.585	1.962	3.087	3.225	2.625
Figure 3-figure supplement 1 C
Area	Cell counts
	No Trimer	HCoV2-Trimer	PNGase F Tx.	Kifunensine Tx.	HCoV-HKU1
1	1	13	11	6	3
2	1	11	12	9	4
3	1	12	13	5	2
4	2	10	9	8	3
5	1	9	16	9	2
6	1	10	15	7	3
