# Supplementary material for: Murine alveolar macrophages rapidly accumulate intranasally administered SARS-CoV-2 Spike protein leading to neutrophil recruitment and damage
Source: eLife. 2024 Mar 20;12:RP86764. doi: 10.7554/eLife.86764 (PMC10954308; doi:10.7554/eLife.86764)
Supplement: Figure 3—source data 1. [file elife-86764-fig3-data1.xlsx]

## Sheet: Sheet1
Evans blue amounts in lung and liver tissue
	C57BL6 mice
Lung
SARS-CoV-2 Spike protein (μg per mouse)	Mouse 1	Mouse 2	Mouse 3
0	16.275	10.195	9.553
0.5	14.028	12.696	9.758
5	19.439	26.212	26.189
Liver
SARS-CoV-2 Spike protein (μg per mouse)	Mouse 1	Mouse 2	Mouse 3
0	10.241	10.299	3.031
0.5	7.055	6.943	8.059
5	7.542	10.418	12.675
