# Supplementary material for: Murine alveolar macrophages rapidly accumulate intranasally administered SARS-CoV-2 Spike protein leading to neutrophil recruitment and damage
Source: eLife. 2024 Mar 20;12:RP86764. doi: 10.7554/eLife.86764 (PMC10954308; doi:10.7554/eLife.86764)
Supplement: Figure 4—figure supplement 1—source data 1. [file elife-86764-fig4-figsupp1-data1.xlsx]

## Sheet: Sheet1
Quantification of neutrophil count in cremaster muscle.
The number of neutrophils was counted in four 100 × 100 μm² areas.
PBS treatment
	Area 1	Area 2	Area 3	Area 4
3h	0	0	0	0
6h	2	1	0	0
Trimer treatment
	Area 1	Area 2	Area 3	Area 4
4h	3	5	4	5
6h	9	13	15	12
