# Supplementary material for: Murine alveolar macrophages rapidly accumulate intranasally administered SARS-CoV-2 Spike protein leading to neutrophil recruitment and damage
Source: eLife. 2024 Mar 20;12:RP86764. doi: 10.7554/eLife.86764 (PMC10954308; doi:10.7554/eLife.86764)
Supplement: Figure 5—source data 1. [file elife-86764-fig5-data1.xlsx]

## Sheet: Sheet1
Purified murine bone marrow neutrophils were exposed to increasing concentrations of Spike protein or fMLP (N-formyl-methionyl-leucyl-phenylalanine) for 4 hours or not.
The percentage of neutrophils undergoing NETosis was measured by flow cytometry.
		WT, n=2
0hr	Media	5.8	5.52
4hr	Media	7.81	6.93
	1uM fMLP	45.9	46
	Trimer (0.1ug/ml)	15.7	14.2
	Trimer (0.25ug/ml)	16.4	15.8
	Trimer (0.5ug/ml)	16.3	15.5
	Trimer (1.0ug/ml)	22.1	17.6
	Trimer (2.0ug/ml)	16.8	17.6
