# Supplementary material for: Murine alveolar macrophages rapidly accumulate intranasally administered SARS-CoV-2 Spike protein leading to neutrophil recruitment and damage
Source: eLife. 2024 Mar 20;12:RP86764. doi: 10.7554/eLife.86764 (PMC10954308; doi:10.7554/eLife.86764)
Supplement: Figure 5—source data 2. [file elife-86764-fig5-data2.xlsx]

## Sheet: Sheet1
Purified human peripheral blood neutrophils were exposed to various Spike protein preparations, lipopolysaccharide (LPS), tumor necrosis factor-α (TNF) or phorbol myristate acetate (PMA).
Graphs show the percentage of DAPI+Helix NP NIR+ cells after either 4 hr or overnight culture. Each point represents a different donor.
Human neutrophils (4h assay)
				Trimer		Kif. Tx Trimer		D614G		Kif. Tx D614G Trimer
Media	LPS	TNF	PMA	0.1	1	0.1	1	0.1	1	0.1	1
1.52	8.03	29.6	43.1	15	18.1	19.5	24.2	15.9	12.5	12	24.4
8.32	32.7	20.6	36.7	15.5	24.6	11.3	28.6	5.77	21.4	16	21.3
7.32	4.9	23.1	48.4	4.43	10.99	7.88	32.3	12.2	21.2	14.16	29
3.04	2.03	23	53.8	5.37	14.37	10.2	28.5	6.75	18.05	14.4	25.12
5.05	11.92	24.08	45.5	10.08	17.02	12.22	28.4	10.16	18.29	14.14	24.96
6.23	13.21	22.23	46.3	8.43	16.65	9.79	29.8	8.24	20.22	14.85	25.14
Human neutrophils (18h assay)
			Trimer		Kif. Tx Trimer		D614G		Kif. Tx D614G Trimer
Media	LPS	TNF	0.1	1	0.1	1	0.1	1	0.1	1
24.6	51.5	56.94	30.6	53	31.8	62.2	37.5	54.4	27.7	68.3
26	56.9	59.4	31.9	59	25.3	63.4	36.9	57.7	22.6	60.6
32.8	82.9	67.3	44.5	78.2	46.6	72.3	41	77.6	40.4	71
39.7	80.7	69	41.8	72.5	41.9	79.4	44	85.9	40.7	70.8
