# Supplementary material for: Murine alveolar macrophages rapidly accumulate intranasally administered SARS-CoV-2 Spike protein leading to neutrophil recruitment and damage
Source: eLife. 2024 Mar 20;12:RP86764. doi: 10.7554/eLife.86764 (PMC10954308; doi:10.7554/eLife.86764)
Supplement: Figure 7—source data 1. [file elife-86764-fig7-data1.xlsx]

## Sheet: Sheet1
Flow cytometry assessment of indicated Spike proteins binding to HEK293 cell permanently transfected with ACE2, various Siglecs, or a combination.
Dual transfected HEK293 cells noted as Siglec-5/8+, ACE2/Siglec-5+, and ACE2/Siglec-8+. Labelled recombinant proteins were incubated with 5 × 103 HEK293 cells on ice for 30 min. intensity.
Data shown as mean fluorescent
	ACE2			Siglec-5+			Siglec-8+
Trimer	46845	41213	44872	19585	19401	1884	4044	3726	3842
D614G	118041	101175	119236	7888	7632	7903	486	485	491
Kif. Tx	5668	4939	4832	1378	1396	1264	42	68	52
PNGasd F Tx.	1724	1564	1756	436	440	471	17	57	49
S1	43698	36582	39264	835	779	804	0	0	0
HKU-1	6	32	41	149	152	137	0	0	1
	Siglec-5/8+			ACE2+/Siglec-5+			ACE2+/Siglec-8+
Trimer	25003	24599	25107	65982	65363	64925	54082	53670	55012
