# Supplementary material for: Murine alveolar macrophages rapidly accumulate intranasally administered SARS-CoV-2 Spike protein leading to neutrophil recruitment and damage
Source: eLife. 2024 Mar 20;12:RP86764. doi: 10.7554/eLife.86764 (PMC10954308; doi:10.7554/eLife.86764)
Supplement: Figure 7—source data 2. [file elife-86764-fig7-data2.xlsx]

## Sheet: Sheet1
Fluorescence intensity of each signal in ROI					Quantity of mean fluorescence intensity of SARS-CoV-2 Spike protein in unit volume (µm3) of indicated cell types
ROI	Siglec-5	ACE2	Trimer		ACE2	Siglec-5	Control
a	0	2.0435	0		98.2	50.6	11.12
	0	6.19705	0
	0	0	0
	0	0	0
	0	0	0
	0	0	0
	0	0	0
	0	0	0
	0	0	0
	0	0	0
	0	0	0
	0	0	0
	0	0	0
	0	0	0
	0	0	0
	0	0	0
	0	0	0
	0	0	0
	0	0	0
	0	0	0
	0	0	0
	0	0	0
	0	0	0
	0	0	0
	0	0	0
	0	0	0
	0	0	0
	0	0	0
	0	0	0
	0	0	0
	0	0.184235	0
	0	0	0
	0	0	0
	0	0	0
	0	0	0
	0	0	0
	0	0	0
	0	0	0
	0	0	0
	0	0	0
	0	0	0
	0	1.08908	0
	0	6.96937	0
	0	1.62621	0
	0	6.6569	0
	0	0.039107	0
	0	0	0
	0	0	0
	11.8663	0	0
	3.13896	0	0
	0	0	0
	0	0	0
	0	0	0
	0	0	0
	0	0	0
	0	0	0
	0	0	0
	0	0	0
	0	0	0
	0	0	0
	0	0	7.25737
	0	0	3.23702
	0	0	3.95739
	0	0	12.1632
	0	0	4.808
	0	0	0
	0	0	0
	0	0	0
	0	0	0
	0	0	0
	0	0	0
	0	0	0
	0	0	0
	0	0	0
	0	0	0
	0	0	0
	0	0	0
	0	0	0
	0	0	0
	0	0	0
	0	0	0
	0	0	0
	0	0	0
	0	0	0
	0	0	0
	0	0	0
	0	0	0
	0	0	0
	0	0	0
	0	0	0
	0	0	0
	0	0	0
	0	0	0
	0	0	0
	0	0	0
	0	0	0
	0	0	0
	0	0	0
	0	0	0
	0	1.83877	0
	0	0	0
	0	0	0
	0	0	0
	0	0	0
	0	0	0
	0	0	0
	0	0	0
	0	0	0
	0	0	0
	0	0	0
	0	0	0
	0	0	0
	0	0	0
	0	0	0
	0	0	0
	0	0	0
	0	0	0
	0	0	0
	2.14611	0	0
	2.82951	0	0
	12.4066	0	0
	0	0	0
	0	0	0
	0	0	0
	0	0	0
	0	0	0
	0	0	0
	0	0	0
	0	0	0
	0	0	0
	0	0	0
	0	0	0
	0	0	0
	0	0	0
	0	0	0
	0	0	0
	0	0	0
	8.69	0	0
	2.61986	0	0
	0	0	0
	0	0	0
	0	0	0
	0	0	0
	0	0	0
	0	0	0
	0	0	0
	0	0	0
	0	0	0
	0	0	0
	0	0	0
	0	0	0
	0	0	0
	0	0	0
	0	0	0
	0	0	0
	0	0	0
	0	0	0
	0	0	0
	0	0	0
	3.00704	0	0
	6.38372	0	0
	0	0	0
	0	0	0
	0	0	0
	0	0	0
	0	4.70962	5.15643
	0	3.57897	0.553999
	0	0	0
	0	2.45117	0
	0	0	5.6836
	0	0	0.711925
	0	0	0
	0	2.00066	0
	0	0	0
	0	0	0
	0	0	0
	0	0	0
	0	0	0
	0	14.5304	0
	0	31.7817	0
	0	2.17698	0.880908
	0	59.7951	17.7826
	0	76.2315	13.5364
	0	56.2976	3.83208
	0	52.6342	0
	0	94.1057	0
	0	63.9789	0
	0	60.8727	0
	0	5.82296	0
	0	10.4488	0
	0	2.59428	0
	0	14.6016	0
	0	8.50577	0
	0	24.0438	0
	0	9.31635	1.74605
	0	12.9167	0
	0	14.2918	0
	0	0.795924	3.55693
	0	0	7.05919
	0.72539	1.31036	0
	0	1.1512	0.070579
	0	0.052388	6.02455
	0	10.1835	0.938795
	0	0.758521	0
	0	8.22585	0
	0	4.00687	0.087445
	0	0	0
	0	6.90766	0
	0	11.6728	0
	0	8.09035	0
	0	0.139383	0.139383
	0	2.91163	0
	0	11.5817	0.494301
	0	0.118914	0
	0	6.69955	0
	0	2.08783	0
	0	19.8355	0
	0	7.18317	0
	0	17.1294	0
	0	12.7828	4.26264
	0	24.1805	0.90974
	0	19.7871	0
	0	9.10595	0
	0	6.94339	0
	0	14.3621	0
	0	23.0682	0
	0	31.3161	2.53404
	0	13.0233	14.7932
	0	72.4539	13.984
	4.67793	76.2437	9.91923
	2.78189	48.1776	23.3089
	0	97.9711	36.6261
	0	123.618	14.046
	0	27.5603	0.526991
	0	96.0071	6.73668
	0	82.2493	5.47875
	0	114.445	2.16275
	0	48.661	6.19047
	0	39.6998	1.71279
	0	22.9501	4.25886
	0	15.2102	9.81074
	0.014279	12.5472	0.011602
	0	60.963	10.9423
	0	31.943	10.8936
	0	50.4771	13
	11.4027	38.9801	5.05468
	4.65954	1.82866	0.319813
	0	4.83193	0
	0	3.61799	0
	0	11.9161	0
	0	12.9507	0
	0	2.47799	0
	0	0.543853	0
	0	17.4651	0
	0	2.84176	0
	0	5.86768	0
	0	0.55665	0
	2.5197	2.04726	0
	3.82965	3.11159	0
	0	0.034794	6.91911
	0	8.31065	10.2238
	0	19.2941	8.03882
	0	15.6027	0
	0	12.1489	1.30332
	0	26.7753	2.42898
	0	38.6717	7.97478
	0	2.6202	0.009281
	0	47.503	10.5962
	0	5.13811	1.00952
	0	9.96911	0
	0	27.7107	0
	0	19.0963	5.33234
	0.427039	16.2211	13.8335
	0	49.5772	19.5114
	0	48.8556	8.84785
	4.89237	13.2116	0
	12.3372	4.79726	0
	0	24.0095	0
	0	7.7241	0
	0	0.099231	0
	0	0.850306	3.986
	0	12.188	2.24093
	0	16.2407	0.563376
	3.67236	20.6487	1.3343
	4.44967	14.4909	0
	0	13.8638	0
	0	13.5161	0
	0	7.10406	0
	0	5.37038	2.89061
	0	0.360032	0.355039
	0	12.3193	12.3193
	0	8.14141	6.71355
	0	23.7708	0.001381
	0	7.70331	0.219712
	0	6.75769	0
	0	0.060303	0
	0	1.53743	0
	0	1.81879	0
	1.19054	6.83738	0
	0	0.152194	0
	0.379301	0.308182	0
	0	5.38541	0
	0	7.83572	2.14798
	0	13.6487	11.6459
	0	19.0849	6.08494
	0	13	0
	4.31939	9.4905	0
	1.61559	4.4387	0
	0	1.08509	0
	0	6.28077	0
	0	33.7656	0
	0	47.5715	16.9776
	0	58.7672	8.56738
	0.060695	75.7138	0
	0	94.06	0
	0	27.8019	0
	0	45.0484	0
	0	30.3464	1.01667
	0	25.1299	12.9823
	0	29.8489	0.665585
	0	18.488	0
	0	10.0206	0
	0	0.978371	0
	0	7.02912	0
	0	4.39407	0
	0	0	0
	0	0	0
	0	0	0
	0	0	0
	0	0.42146	0
	0	7.75272	0
	0	12.7744	0
	0	0.60668	0
	0	16.8172	0
	0	6.55117	0
	0	7.01172	0
	0	13.2212	7.45665
	0	15.2275	4.07568
	0	21.6068	1.78007
	0	13.8613	0
	0	11.0515	0
	0	4.32561	0.392331
	0	0.155564	0
	0	11.9576	0
	0	0.041834	0
	0	6.92117	0
	0	0.363625	0
	0	0	0
	0	3.69891	0
	0	0.100204	0
	5.48018	0	0
	2.07879	0	1.47046
	0.904977	0	0
	5.88247	0	0
	0	0	0
	0	0	0.639644
	0	0	8.36084
	0.006138	0	0
	7.081	0	0
	13.8522	0	0
	11.9302	0	7.50057
	8.90099	0	13.0575
	5.88658	0	17.627
	16.4527	4.09495	24.4722
	40.118	6.23029	32.7096
	4.96024	0.369525	4.66278
	34.1062	0	22.2442
	49.4656	0	35.972
	51.2016	1.31648	40.1489
	21.9735	3.76494	19.1516
	47.5114	11.1158	12.9903
	17.3654	0.437975	6.6153
	30.8241	0	0.159004
	12.9847	0	14.8733
	26.3358	9.07316	24.5627
	0.290109	5.188	0.37774
	25.7683	2.79632	9.26407
	25.3678	5.22891	11.1873
	7.59269	5.94878	5.94878
	8.42037	0	0
	28.9735	0	0
	18.2575	0	0
	40.2577	0.212364	0
	0.019413	0	0.066306
	8.63683	0	5.06565
	15.5098	0	10.8032
	6.74658	0	1.8715
	3.59634	0	6.78332
	0	0.093084	0.248905
	0	3.09649	3.37556
	8.19197	0	0.605644
	12.8485	3.91255	1.53191
	3.22382	6.14334	8.68331
	0	3.09199	0.241686
	2.83305	10.907	6.06795
	5.52298	0.158226	10.184
	24.2996	0	0
	13.8904	0	0
	28.9	0	0
	29.4799	5.96015	0
	32.355	2.62125	0
	37.3058	0	0
	27.8929	0	0
	41.7663	0	0.218658
	36.2915	3.30277	0
	57.4883	3.36225	0
	50.5876	2.70134	0
	48.4537	9.37814	0
	5.12899	0.710901	0
	50.5375	9.0791	3.81306
	128.445	0.281282	0.609882
	89.4426	11.1098	20.7363
	135.311	8.33319	7.77808
	125.791	32.1647	3.30561
	150.739	23.6769	3.87412
	156.955	20.3885	7.38562
	184.897	27.72	0.097629
	131.303	9.5579	3.18969
	31.5628	1.67964	0.265278
	139.014	4.72592	9.88224
	83.3347	14.5313	0
	131.186	14.0278	1.11974
	150.959	16.8057	17.3557
	63.6102	0.46344	1.52484
	46.3374	0.234223	0.468446
	35.6312	0	0
	15.3958	0	0
	36.0164	0	1.41631
	29.66	0	0
	19.1083	0.465715	0
	12.5502	0	2.78811
	0.692554	0	0.3752
	0.899954	0	0
	8.32239	0	0
	0	0.012195	0
	0	5.13841	0
	0	0.681905	0
	1.26613	0.329193	0
	0	0	10.1366
	0	0	3.86242
	5.47787	2.78638	0
	1.69547	0.283791	0.437562
	8.4424	0	12.0786
	6.32805	0	5.22552
	10.9015	0	19.6011
	3.46181	0	13
	0	0	12.3008
	1.32164	0.741704	12.8167
	8.76371	0	18.0559
	12.7233	0	24.5514
	18.0133	9.02535	25.5772
	8.93548	0.091847	0.588642
	16.1332	0.021432	9.19332
	14.9203	0	16.213
	21.758	0	10.4248
	21.1991	0	6.27221
	36.197	0	7.98853
	33.091	8.31082	5.06521
	22.1693	23.8715	7.58889
	44.5644	7.51255	7.86921
	50.9162	11.8416	2.84108
	40.8676	0	6.53858
	59.7173	0	11.5904
	61.7517	3.12705	4.45057
	32.5502	8.85633	0.263825
	84.0049	7.45322	0.745785
	90.5015	3.64103	2.15655
	118.28	6.05481	0
	123.328	1.52506	0
	103.72	6.32238	0
	99.0118	17.6569	0
	80.1271	1.23275	0
	25.7695	10.1084	0
	31.9774	9.86317	0
	5.3053	0.076695	0.076695
	79.0289	0.68939	0.68939
	56.64	0	3.7095
	84.2911	0	2.03544
	82.5536	10.178	0
	49.6495	11.2938	0
	40.2538	5.16026	0
	87.384	1.87551	6.1792
	100.727	3.48555	7.81981
	161.227	7.9261	4.18118
	165.567	14.163	9.81783
	71.4853	15.1832	7.46245
	138.694	20.3328	29.616
	4.6671	0.307651	3.45737
	164.814	0.189007	38.3685
	131.458	41.3158	10.3312
	5.53885	0.611155	8.509
	106.053	8.32338	3.19746
	82.6017	5.8556	3.68907
	96.6588	0.803801	0.35917
	71.3282	4.1687	0
	33.9729	2.22209	0
	46.0609	0.915547	0.436054
	43.5096	1.57378	4.82962
	31.3211	9.52012	0
	29.1595	0.874111	0
	17.4945	4.4412	0
	44.9557	0	0
	34.2257	0	0
	6.52177	0	0
	64.647	2.766	0
	111.177	16.0208	0
	94.5088	11.5339	0
	51.9592	2.34901	0
	47.7486	8.40356	0
	59.1365	0	0
	43.5214	1.46163	0
	17.5154	0.723327	0
	24.1223	0	0.820844
	49.344	0	3.70666
	2.73177	0	0
	13.8005	11.4961	0
	1.01323	0.691124	0
	27.2698	1.00143	0
	36.147	0	0
	31.6216	0	0
	16.5997	0	0
	25.0706	0.944764	0.944764
	19.2948	0	0
	22.4125	3.22082	0
	50.2629	10.7782	0
	32.6474	4.39726	0
	58.2138	0.170522	0
	43.5782	10.3841	0
	46.3207	6.87022	0
	6.39379	2.06102	0
	96.4799	8.4176	0
	105.362	9.15491	0
	70.8652	0	0
	173.016	6.45291	3.22645
	119.986	7.2395	1.00389
	115.101	8.76729	0
	153.468	9.68091	2.09534
	221.054	45.4761	10.3716
	106.171	23.3884	0
	129.347	12.8074	0
	94.6621	0.608061	0
	66.649	6.64172	0
	66.7673	22.7649	0
	60.6241	11.5548	0
	41.0331	7.202	2.0046
	5.6506	0.836958	0.052869
	43.5411	3.33391	3.60772
	45.0807	7.15491	0
	15.9629	0	0
	19.6124	0	0
	40.4671	0	0
	16.7788	0	0
	30.1664	0	0
	1.65335	0	0
	19.1042	0	7.23217
	16.1127	0	2.74747
	21.082	0	0
	10.8583	0	1.58015
	0	0.43058	0.957575
	12.4928	3.95016	5.38497
	19.7366	5.12275	0.198426
	10.4337	5.5686	0
	9.30701	2.44972	0
	2.6571	9.55101	0
	20.4673	6.20702	0
	35.0605	0.240755	0
	6.19321	8.51116	0
	5.7181	0.530094	0
	11.8635	0	0
	13.8321	0	0
	8.75504	0	0
	4.43937	0.458759	0
	35.6403	4.71156	0
	25.6737	0	0
	0.632502	1.772	0
	4.85538	10.4438	0
	8.30522	8.66744	0
	31.6432	0	0
	31.9931	0	0
	21.5122	0	0
	4.6294	2.86023	0
	0.45213	0	0.367356
	5.44111	0	0
	9.80623	0	0
	13.883	0	5.09126
	8.26799	4.33082	2.08671
	0.507016	7.11505	0
	0.004969	0	0
	0	0	0
	5.34232	0	0
	7.70209	0	0
	1.37268	0	0.266606
	10.05	0	0.291126
	3.22923	0	0
	0.62269	0	0
	4.85625	0	0
	10.048	0.298775	0
	4.54661	0	0
	0	0	0
	0	0	0
	0.741557	0	0
	10.83	0	0
	0	0	1.61955
	0	0	3.69514
	0.70868	0	0
	16.8204	0	0
	2.73334	0	0
	10.448	0	0.64318
	1.69548	0	0
	0	0	8.17502
	3.63664	0	3.39088
	12.6876	0	0
	7.74708	0	0
	0	0	0
	0	0	0
	0	0	0
	0	0	0
	0	0	0
	0	0	0
	0	0	0
	0	0	0
	0	0	0
	0	0	0
	0	0	0
	0	0	0
	0	0	0
	0	0	0
	0	0	0
	1.71919	0	0
	0.04929	0	0
	0	0.057649	0
	0	6.96492	0
	0	12.3965	0
	0	1.75651	0
	0	0	0
	0	0	0
	4.44052	0	0
	0.848558	0	0
	0	3.81344	0
	0	2.82649	0
	0	0	3.12863
	0	0	5.85384
	0	0	0
	0	0	0
	0	0	0
	0	0	0
	0	0	0
	0	0	0
	0	0	0
	0	0	0
	0	0	0
	0	0	0
	0	0	0
	0	0	0
	0	0	0
	0	0	0
	0	0	0
	0	0	0
	0	0	0
	0	0	0
	0	0	0
	0	0	1.03515
	0	0	0
	0	0	0
	0	0	0
	0	0	0
	0	0	0
	0	0	0
	0	0	0
	0	0	0
	0	0	0
	0	0.128699	0
	0	1.32214	0
	0	0	0
	0	0	0
	0	0	0
	0	0	0
	0	0	0
	0	0	0
	0	0	0
b	0	0	0
