# Supplementary material for: Murine alveolar macrophages rapidly accumulate intranasally administered SARS-CoV-2 Spike protein leading to neutrophil recruitment and damage
Source: eLife. 2024 Mar 20;12:RP86764. doi: 10.7554/eLife.86764 (PMC10954308; doi:10.7554/eLife.86764)
Supplement: Figure 7—source data 3. [file elife-86764-fig7-data3.xlsx]

## Sheet: Sheet1
Transduction of Spike protein expressing lentiviruses into ACE2/HEK293 transfectants.
Lentiviruses envelop proteins: control (none), human coronavirus HKU1 Spike protein (HKU1), human coronavirus 229E Spike protein (229E), and SARS-CoV-2 Spike protein (CoV-2) are indicated.
Control Lenti	0.0307918	0.0408979	0.0715778	0.714286	0.61
HKU1	0.00542522	0.00351912	0	1.51786
229E	0	0	0.198537	0.1
CoV2 Lenti (12.5ul)	42.2287	50.22	43.21	46.78
CoV2 Lenti (50ul)	142.229	128.4	132.05	138.31
CoV2 Lenti (25ul)	106.158	104.399	100	97.48	102.52
RBD Nab (R001)	0.296319	0.19221	0.101045	0.892857
rh ACE2-Fc	2.9111	1.88831	0.992685	3.30357
rh Siglec-5-Fc (Sino) 0.5	72.24	70.35	71.83	70.95
rh Siglec-5-Fc (Sino) 2	59.62	71.92	68.3284	67.1554	68.915
rh Siglec-5-Fc (Sino) 10	45.74	46.06	44.65	45.89
rh Siglec-1	113.783	134.897	117.595	116.81
rh Siglec-2-Fc	107.918	112.317	110.068
rm Siglec-F-Fc	111.99	124.61	125.38	118.98	117.65
