# Supplementary material for: Murine alveolar macrophages rapidly accumulate intranasally administered SARS-CoV-2 Spike protein leading to neutrophil recruitment and damage
Source: eLife. 2024 Mar 20;12:RP86764. doi: 10.7554/eLife.86764 (PMC10954308; doi:10.7554/eLife.86764)
Supplement: Figure 8—source data 1. [file elife-86764-fig8-data1.xlsx]

## Sheet: Sheet1
Macrophage cytokine profiles following exposure to different Spike proteins. Quantification of macrophage-associated cytokines in response to indicated Spike proteins.
TNF-𝛼	Basal														CHO Trimer (0.1 𝜇g)														CHO Trimer (1 𝜇g)														293 Trimer (0.1 𝜇g)
M0	41.4	25.66	84.85	84.85	84.85	92.6	5.83	5.83	5.83	5.83	5.83	5.83	5.83	5.83	104.71	121.57	124.95	84.85	121.71	84.85	5.83	5.83	5.83	5.83	5.83	5.83	5.83	5.83	636.38	376.88	326.13	633.35	245.83	369.24	9.25	5.83	5.96	5.83	5.83	5.83	5.83	5.83	211.16	336.68	237.12	262.27	191.79	202.61	1415.37
M1	1436.2	1588.95	1048.67	998.81	1141.03	1098.67	3207.93	1991.2	129.56	192.78	1945.29	2552.45	775.72	687.98	858.99	1098.77	879.6	678.8	1099.84	853.65	1413.46	1397.83	643.27	697.71	2367.81	2880.52	1441	1565.08	1472.12	2165.39	3600.06	1360.6	1858.5	587.47	2044.7	1182.8	471.62	804.12	3019.04	2812.18	1835.94	1916.75	434.16	847.74	963.45	952.12	2044.93	1145.28	1560.18
M2	53.48	54.76	97.36	84.85	84.85	102.87	17.82	24.6	15.82	16.02	17.95	17.55	20.3	22.18	71.44	58.04	366.34	879.21	320	213.78	19.23	16.09	16.42	20.03	18.76	20.84	14.56	13.96	516.12	308.68	388.37	378.38	212.55	635.32	15.62	14.69	19.63	24.13	22.45	22.52	11.79	20.57	320.01	343.35	950.54	115.92	488.97	225.29	1630.67
IL-6	Basal														CHO Trimer (0.1 𝜇g)														CHO Trimer (1 𝜇g)														293 Trimer (0.1 𝜇g)
M0	21.44	5.08	31.94	27.66	35.4	26.55	13.29	12.48	4.38	4.38	8.22	10.53	4.8	5.81	241.57	337.79	349.34	758.04	318.79	850.33	9.96	35.76	4.38	5.19	4.38	8.66	4.38	4.38	1539.58	1320.25	1620.8	1272.06	2117.16	1473.89	229.26	57.79	4.38	4.38	12.96	11.58	4.38	6.12	624.99	931.15	41.8	33.55	40.99	37.85	3891.41
M1	4574.6	4842.28	881.19	1846.05	1043.49	1372.99	5165.45	6220.71	3870.25	3969.23	5515.86	8526.12	5827.85	5183.73	4854.39	5950.69	1974.69	3920.37	1414.55	2587.29	14213.5	14457	5428.59	5551.99	15148.5	14502	11983.5	11913.1	4854.39	5950.69	4884	6783	3540	6213.86	16322.8	15686.5	6347.17	7439.94	16684.1	18175.9	14420.5	14026.5	2463.51	4693.9	538.69	1059.71	756.44	1666.41	15109.5
M2	5.72	6.78	36.73	15.58	41.7	94.37	9.24	7.45	4.57	4.57	25.15	27.49	4.71	4.57	60.47	49.87	496.56	373.27	630.29	1012.49	12.08	13.39	4.57	4.57	28.67	34.88	4.57	6.37	1264.88	695.13	721.03	746.5	980.49	899.92	20.14	28.45	4.57	4.57	39.89	56.48	6.99	4.57	838.43	653.6	58.81	193.29	64.35	127.41	12196
IL-10	Basal														CHO Trimer (0.1 𝜇g)														CHO Trimer (1 𝜇g)														293 Trimer (0.1 𝜇g)
M0	7.29	7.29	15.23	47.15	11.27	64.47	7.9	7.69	5.25	5.57	11.86	11.54	35.34	27.99	8.19	11.74	8.66	113.7	8.66	32.62	5.25	16.03	8.39	6.68	6.43	11.39	26.82	31.89	46.99	43.12	30.9	88.59	81.42	94	23.75	5.91	9.41	14.66	8.76	9.61	25.72	25.98	28.24	37.55	8.89	86.58	8.66	95.06	125.16
M1	13.97	7.29	12.06	8.66	8.66	8.66	481.2	342.9	36.44	41.45	591.96	666.37	179.12	159.67	9.55	7.29	21.17	8.66	11.77	8.66	312.7	268.86	99.13	118.85	642.62	593.02	273.44	296.29	7.29	7.29	8.79	37.26	29.43	45.37	379.46	327.34	127.56	160.63	693.62	759.1	345.49	316.13	12.92	7.29	8.66	8.66	8.66	25.82	410.8
M2	25.53	24.14	60.55	87.73	65.86	87.45	19.39	18.15	18.33	19.54	43.57	42.7	38.99	36.67	25.7	29.07	65.55	78.11	45.54	37.44	25.83	36.54	22.16	23.08	53.04	62.61	46.75	53.96	52.55	66.96	133.4	140.89	242.99	169.79	22.12	33.17	20.8	18.72	52.09	52.49	48.67	51.35	42.74	36.38	50.05	25.63	56.25	71.15	191.22
IL-12p40	Basal														CHO Trimer (0.1 𝜇g)														CHO Trimer (1 𝜇g)														293 Trimer (0.1 𝜇g)
M0			77.59	77.59	77.59	77.59	20.21	20.21	20.21	20.21	20.21	20.21	20.21	20.21			77.59	77.59	77.59	77.59	20.21	20.21	20.21	20.21	20.21	20.21	20.21	20.21			77.59	77.59	77.59	77.59	20.21	25.32	20.21	20.21	20.21	20.21	20.21	20.21			77.59	77.59	77.59	77.59	20.21
M1	1484.8	1343.2	792.85	866.84	863.86	920.41	233.655	150.93	625.665	685.05	302.865	355.515	579.675	518.745	1484.8	1343.2	283.75	330.1	742.53	494.88	221.72	193.38	1444.44	1704.34	439.36	429.36	1119.18	1141.34	1809.9	1303.1	921.15	833.26	871.31	725.95	266.52	307.06	2097.02	2301.38	515.48	517.76	1236.96	1239.12	1530.1	1585.4	650.99	341.39	726.7	694.22	284.28
M2	201.1	221.03	77.59	89.02	77.59	77.59	74.598	72.219	71.811	76.893	63.699	67.32	62.292	66.36	201.1	221.03	77.59	77.59	77.59	77.59	71.985	60.381	68.391	70.815	62.415	72.453	53.598	64.671	224.76	141.17	77.59	77.59	77.59	77.59	65.88	71.106	74.019	72.276	66.84	70.578	63.882	64.611	246.85	215.898	77.59	130.37	77.59	77.59	68.868
IL-1𝛽	Basal														CHO Trimer (0.1 𝜇g)														CHO Trimer (1 𝜇g)														293 Trimer (0.1 𝜇g)
M0	15.98	12.21	6.26	6.26	6.26	6.26	0.81	0.81	0.81	0.81	0.81	0.81	0.81	0.81	8.85	14.05	6.26	6.26	6.26	6.26	0.81	0.81	0.81	0.81	0.81	0.81	0.81	0.81	9.7	8.25	6.26	6.26	6.26	6.26	0.81	0.81	0.81	0.81	0.81	0.81	0.81	0.81	10.8	9.79	6.26	6.26	6.26	6.26	1.63
M1	29.21	25.33	21.63	32.43	18.78	27.9	33.8	11.52	1.11	1.11	19.31	19.52	1.11	1.11	26.06	32.96	18.78	26.61	18.78	22.74	28.23	11.7	30.33	45.33	76.53	78.21	39.66	42.42	33.52	26.71	53.28	115.11	35.91	50.78	27.6	34.98	60.33	5.55	70.2	73.89	76.89	81.36	35.32	35.05	18.78	18.78	18.78	18.78	36.15
M2	13.36	13.76	11.57	15.1	19.19	13.62	7.33	6.02	4.18	5	5.43	6.41	3.73	3.75	10.63	13.6	18.41	17.76	17.18	9.55	8.05	4.7	4.45	5.72	2.92	4.4	3.02	2.77	12.13	14.9	18.28	6.26	20.76	16.59	6.29	4.63	3.62	4.45	3.07	3.07	4.28	4.78	16.34	10.29	14.39	6.26	11.7	14.39	11.23
IL-1RA	Basal														CHO Trimer (0.1 𝜇g)														CHO Trimer (1 𝜇g)														293 Trimer (0.1 𝜇g)
M0	2237.2	1665.6	14658	727	13923	929	1855	1856	1594	1657	1830	1844	3156	1798	3289	3016.6	10592	1091	8694	1329	1937	2275	1881	2182	1545	2101	1969	2459	3763.9	3003	11189	3601	25513	7652	1744	1690	2386	1827	1369	1577	1840	1817	1875.5	3433.4	7683	939	16602	1666	2895
M1	3481.5	3044	17528	19518	13707	5726	2992	2897	2856	1625	2642	2444	2187	2285	3805.6	4037.3	9237	13407	14628	5388	2281	2009	2129	1999	2559	2172	3625	2808	2329.3	2632.3	26542	27395	25840	23041	1866	2464	2405	2171	2415	2222	3487	2605	4249.6	2191.1	17655	6143	13699	11134	2420
M2	8081.9	7520.3		32931	39683	20924	9856	12768	8407	9026.5	10041.5	12173	7399	10146.5	10471.3	13466.1	13199	32789	28950	25594	9457	14360.5	9282	12327	10395	12442.5	10024	10006.5	16666.9	17731.3	73389	82789	88950	88035	7150.5	12383	10129	16803.5	10888.5	9555	9390.5	8501.5	12887.9	13614.3	22910	16485	19767	12086	18151
IL-12p70	Basal														CHO Trimer (0.1 𝜇g)														CHO Trimer (1 𝜇g)														293 Trimer (0.1 𝜇g)
M0	2.05	2.05	6.068	6.068	6.068	6.068	0.85	0.73	0.73	0.73	0.73	0.73	0.73	0.73	2.05	2.05	6.068	6.068	6.068	7.462	0.73	0.73	1.12	0.73	0.73	0.73	0.73	0.73	2.05	2.05	6.068	7.3595	6.068	6.068	0.73	0.73	0.73	1.01	0.73	0.73	0.73	0.73	2.05	2.05	6.068	6.068	6.068	6.068	0.73
M1	19.26	30.17	57.0096	191.278	57.0096	89.3032	27.67	16.4	91.22	78.73	38.99	36.28	56.6	51.67	41.26	26.21	157.369	58.2232	116.445	58.2232	18.86	14.95	95.28	144.29	48.21	46.05	103.77	94.56	70.34	55.65	199.356	163.806	199.356	163.806	18.66	19.09	119.56	160.25	37.13	41.75	85.16	80.91	19.77	19.67	163.39	77.5816	175.768	77.5816	32.36
M2	3.28	3.67	9.7088	10.8632	9.7088	10.8632	0.7	2.23	0.7	0.7	0.76	0.7	0.7	0.7	2.05	4.97	6.068	9.1464	6.068	9.1464	0.7	0.7	0.7	0.7	0.7	0.7	0.7	0.7	2.05	2.05	8.514	6.068	6.364	6.068	0.7	0.7	0.7	0.7	0.7	0.7	1.39	0.7	2.05	3.09	6.068	14.7112	6.068	14.7112	0.7
TARC	Basal														CHO Trimer (0.1 𝜇g)														CHO Trimer (1 𝜇g)														293 Trimer (0.1 𝜇g)
M0	2.4	2.6	112.25	27.69	97.39	16.67	1.29	1.45	1.7	7.8	1.29	6.35	12.95	10.53	10	2.4	174.07	127.69	143.55	123.91	1.29	7.63	1.29	2.31	1.91	1.29	5.53	9.83	10.1	12.64	764.59	638.45	371.05	619.55	1.29	1.29	7.54	3.99	1.29	1.29	6.73	5.95	12.5	12.1	81.25	15.54	102.87	10.07	9.24
M1	46.07	2.6	164.73	2.23	127.78	31.35	38.09	32.82	30.22	31.81	43.58	43.2	61.42	59	42.76	9.4	40.5	24.26	15.92	20.36	34.5	29.94	31.98	61.65	53.24	49.34	53.46	54.02	13	43.14	85.14	90.86	188.95	104.68	32.99	35.15	50.23	59.29	49.43	50.15	49.82	46.25	40.01	11.4	138.63	45.59	124.59	38.97	36.3
M2	120.81	135.04	4440.15	4140.12	3314.31	2552.46	2437.76	2100.48	1934.08	2035.84	2789.12	2764.8	3930.88	3776	161.15	127.67	4641.27	5924.51	4596.29	6921.89	2208	1916.16	2046.72	3945.6	3407.36	3157.76	3421.44	3457.28	285.99	195.58	9455.69	8874.43	9233.74	9018.34	2111.36	2249.6	3214.72	3794.56	3163.52	3209.6	3188.48	2960	215.24	216.79	4109.37	6546.03	2034.45	4591.92	2323.2
[truncated: 51 more columns]
